# Supplementary material for: Ranking environmental degradation trends of plastic marine debris based on physical properties and molecular structure
Source: PubMed Central journal article supplement (PMC7002677; doi:10.1038/s41467-020-14538-z), 2020-02-05
Supplement: 41467_2020_14538_MOESM3_ESM.pdf [file 41467_2020_14538_MOESM3_ESM.pdf]

## **Description of Additional Supplementary Files**

File Name: Supplementary Code 1

Description: The python code for machine learning

File Name: Supplementary Code 2

Description: Construction of Figures 2-5
